# Supplementary material for: Hydroalumination of alkynyl-aminophosphines as a promising tool for the synthesis of unusual phosphines: P–N bond activation, a transient phosphaallene, a zwitterionic AlP2C2heterocycle and a masked Al/P-based frustrated Lewis pair
Source: Royal Society of Chemistry journal article supplement (doi:10.1039/c5dt02825f), 2015-09-22

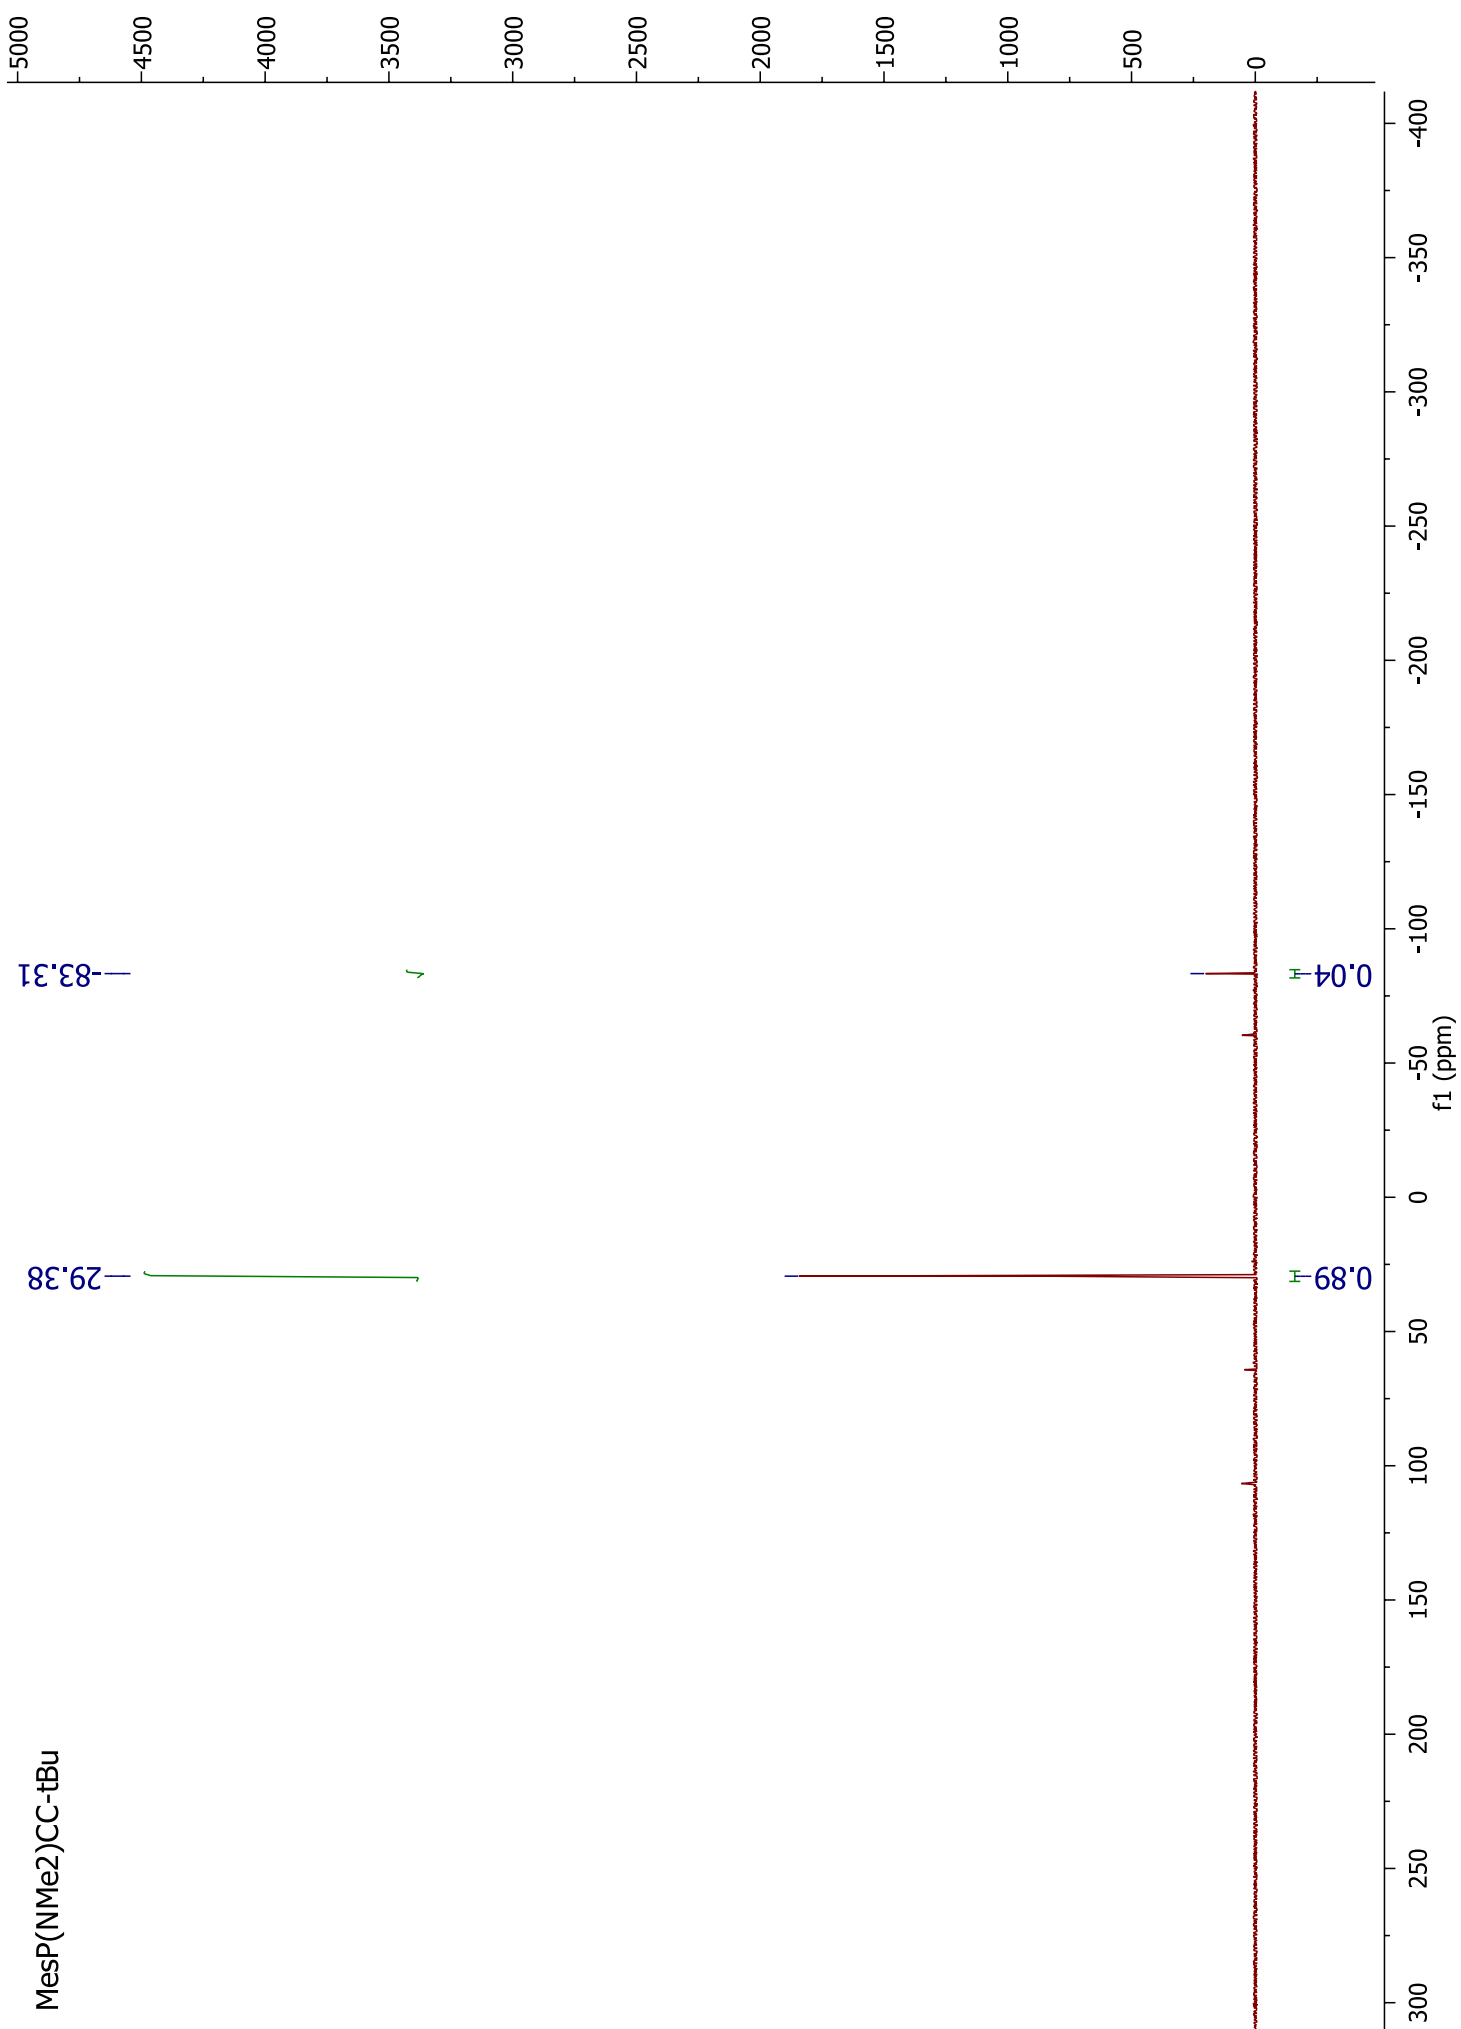

MesP(NMe2)CC-tBu

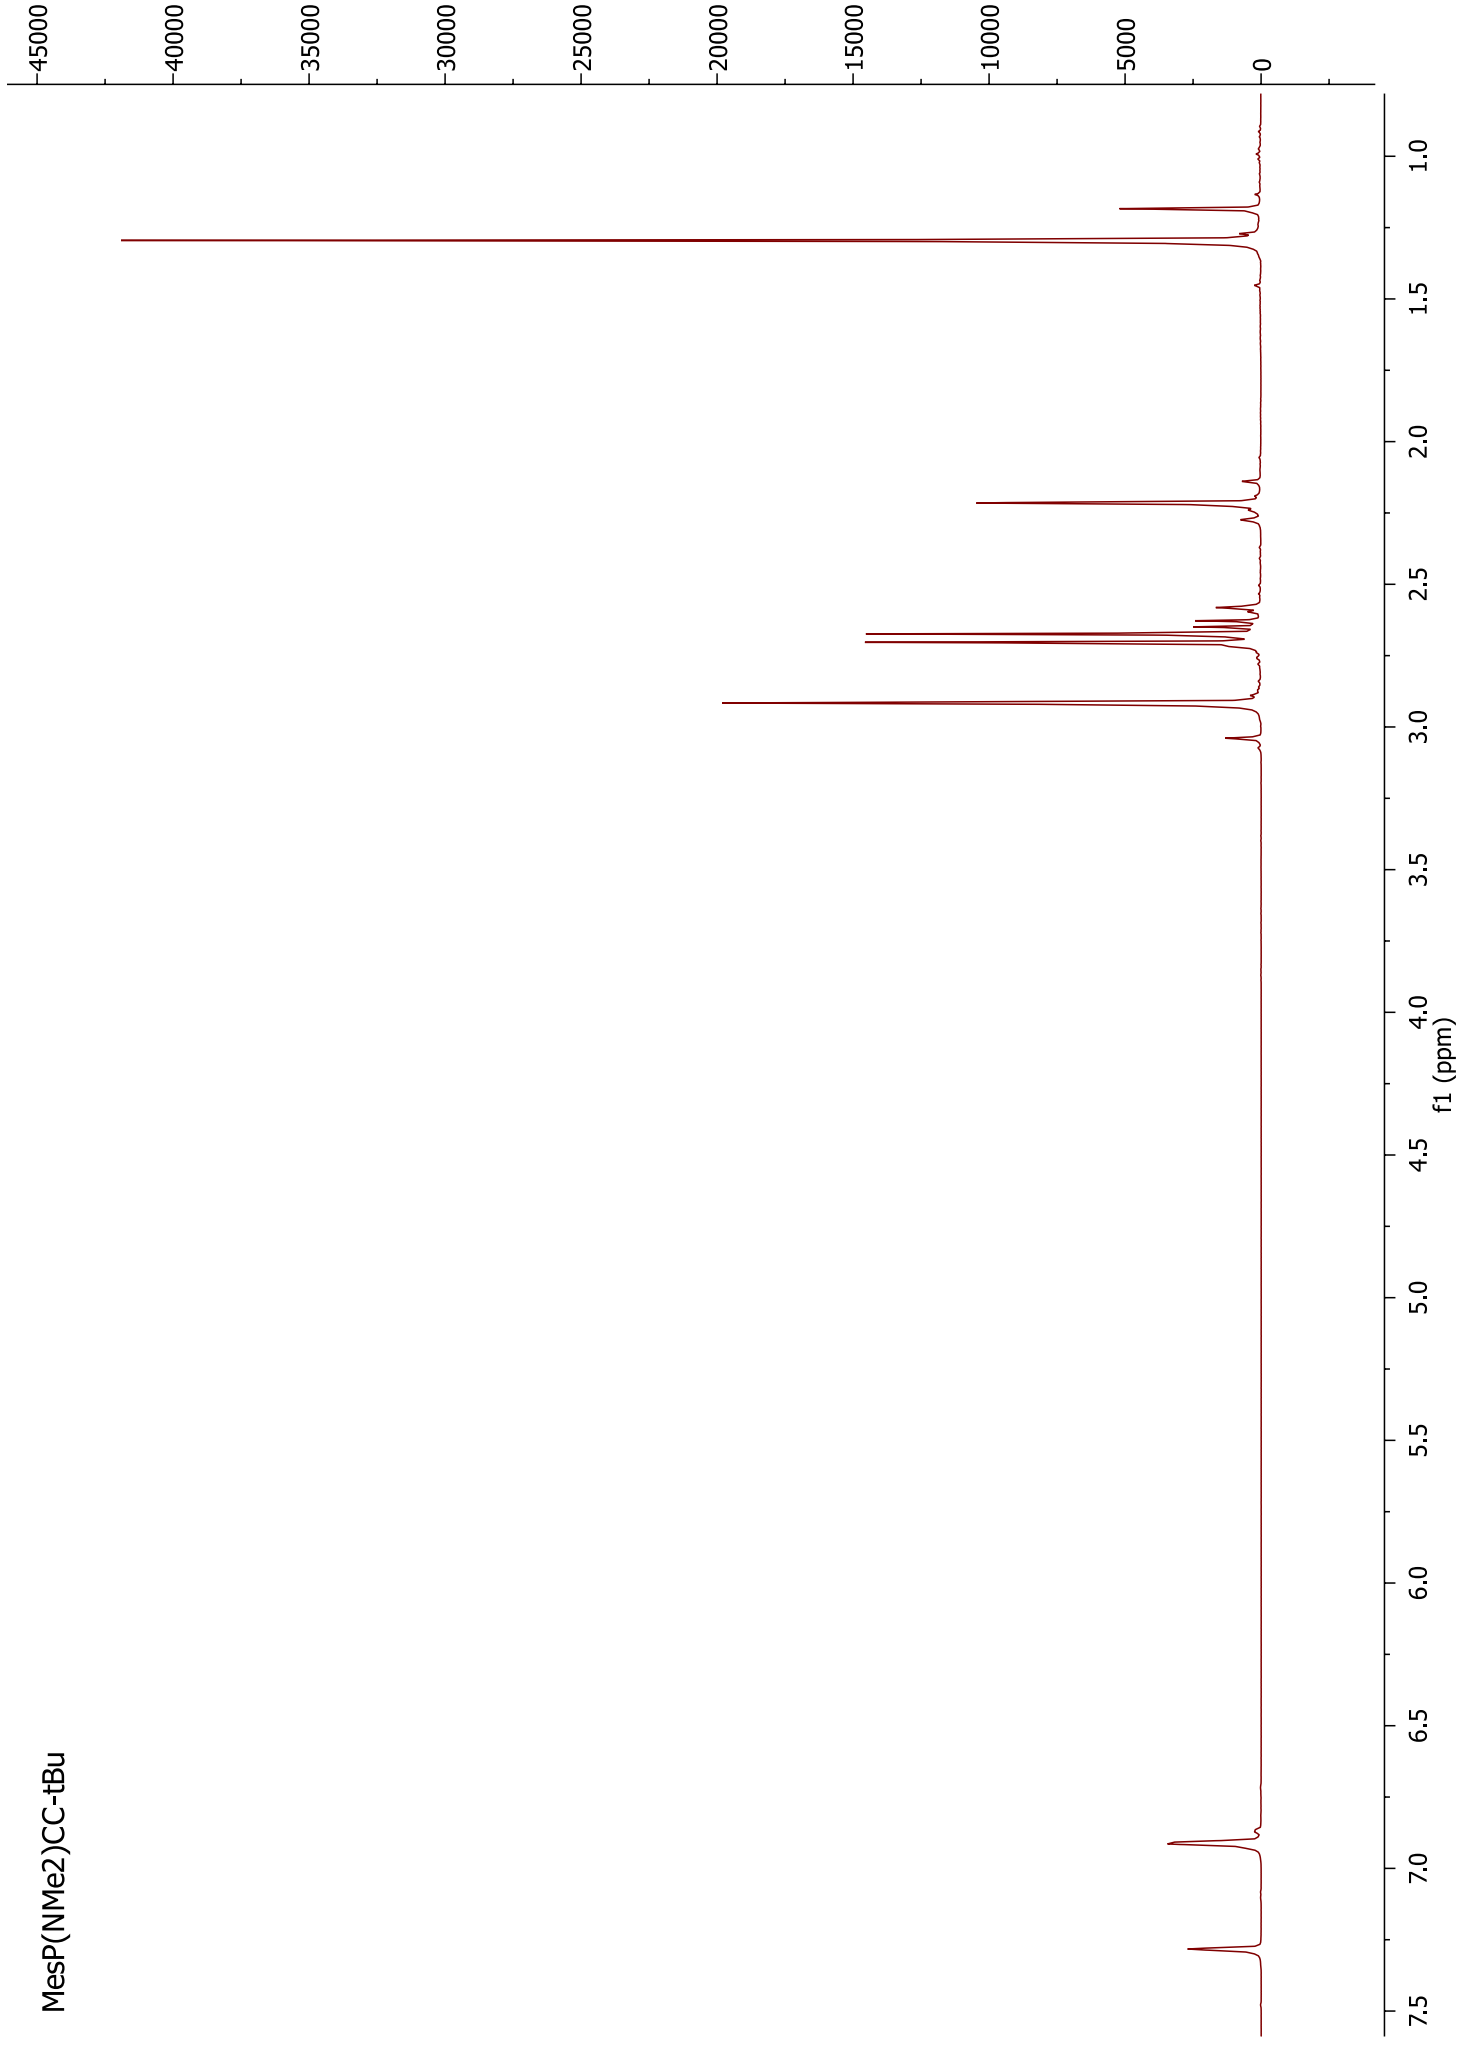

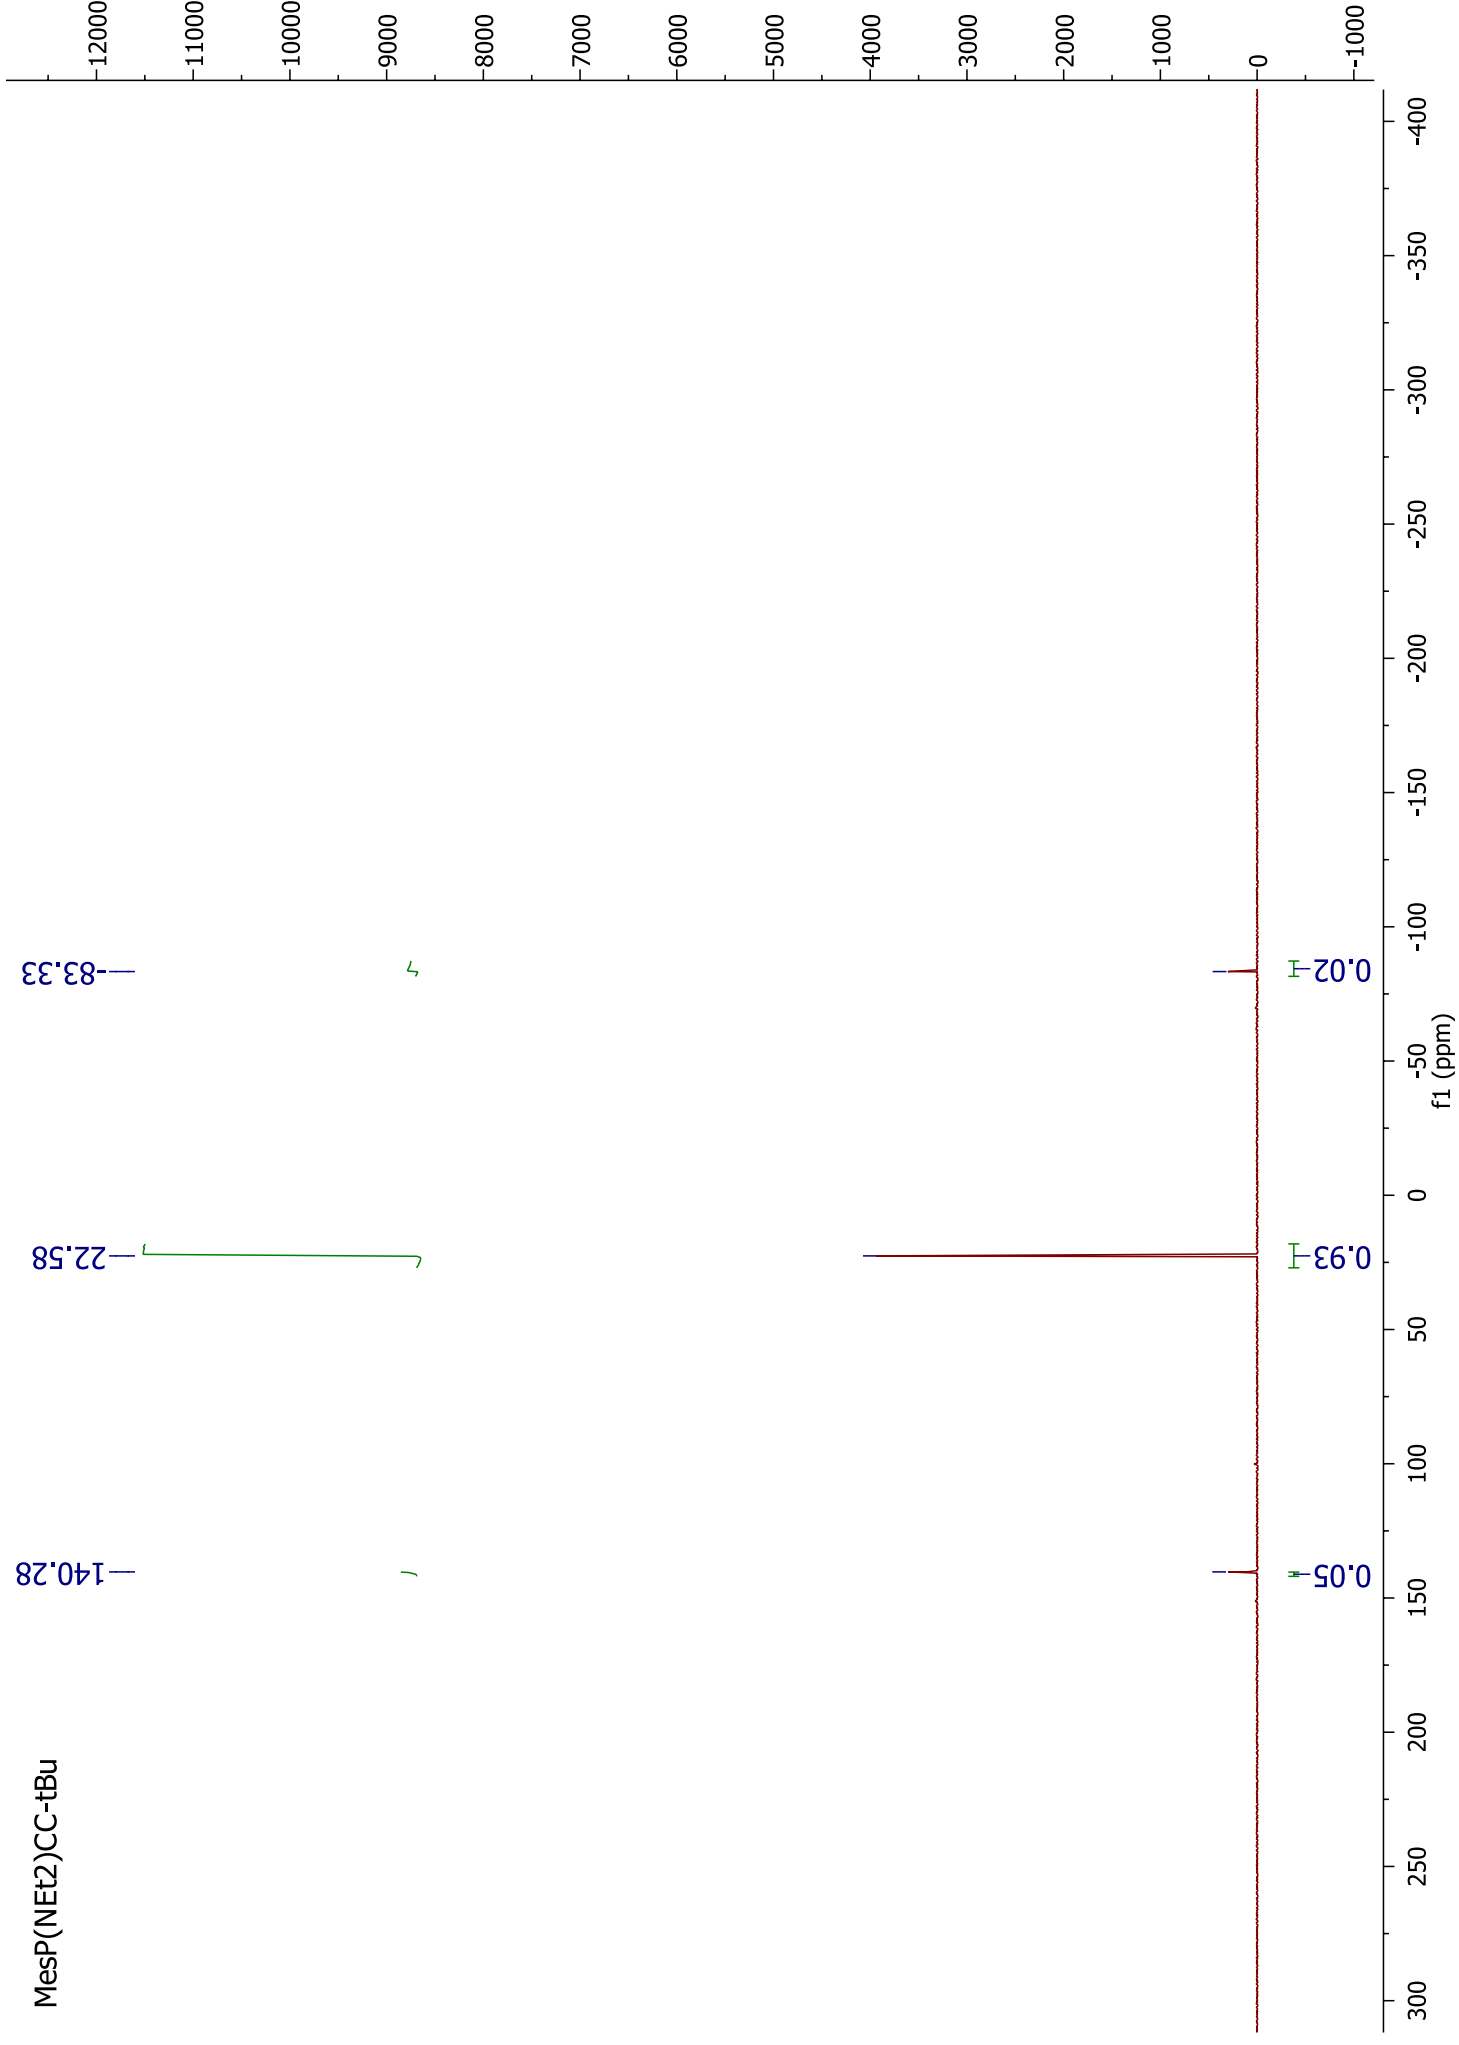

MesP(NEt<sub>2</sub>)CC-tBu

MesP(NEt<sub>2</sub>)CC-tBu

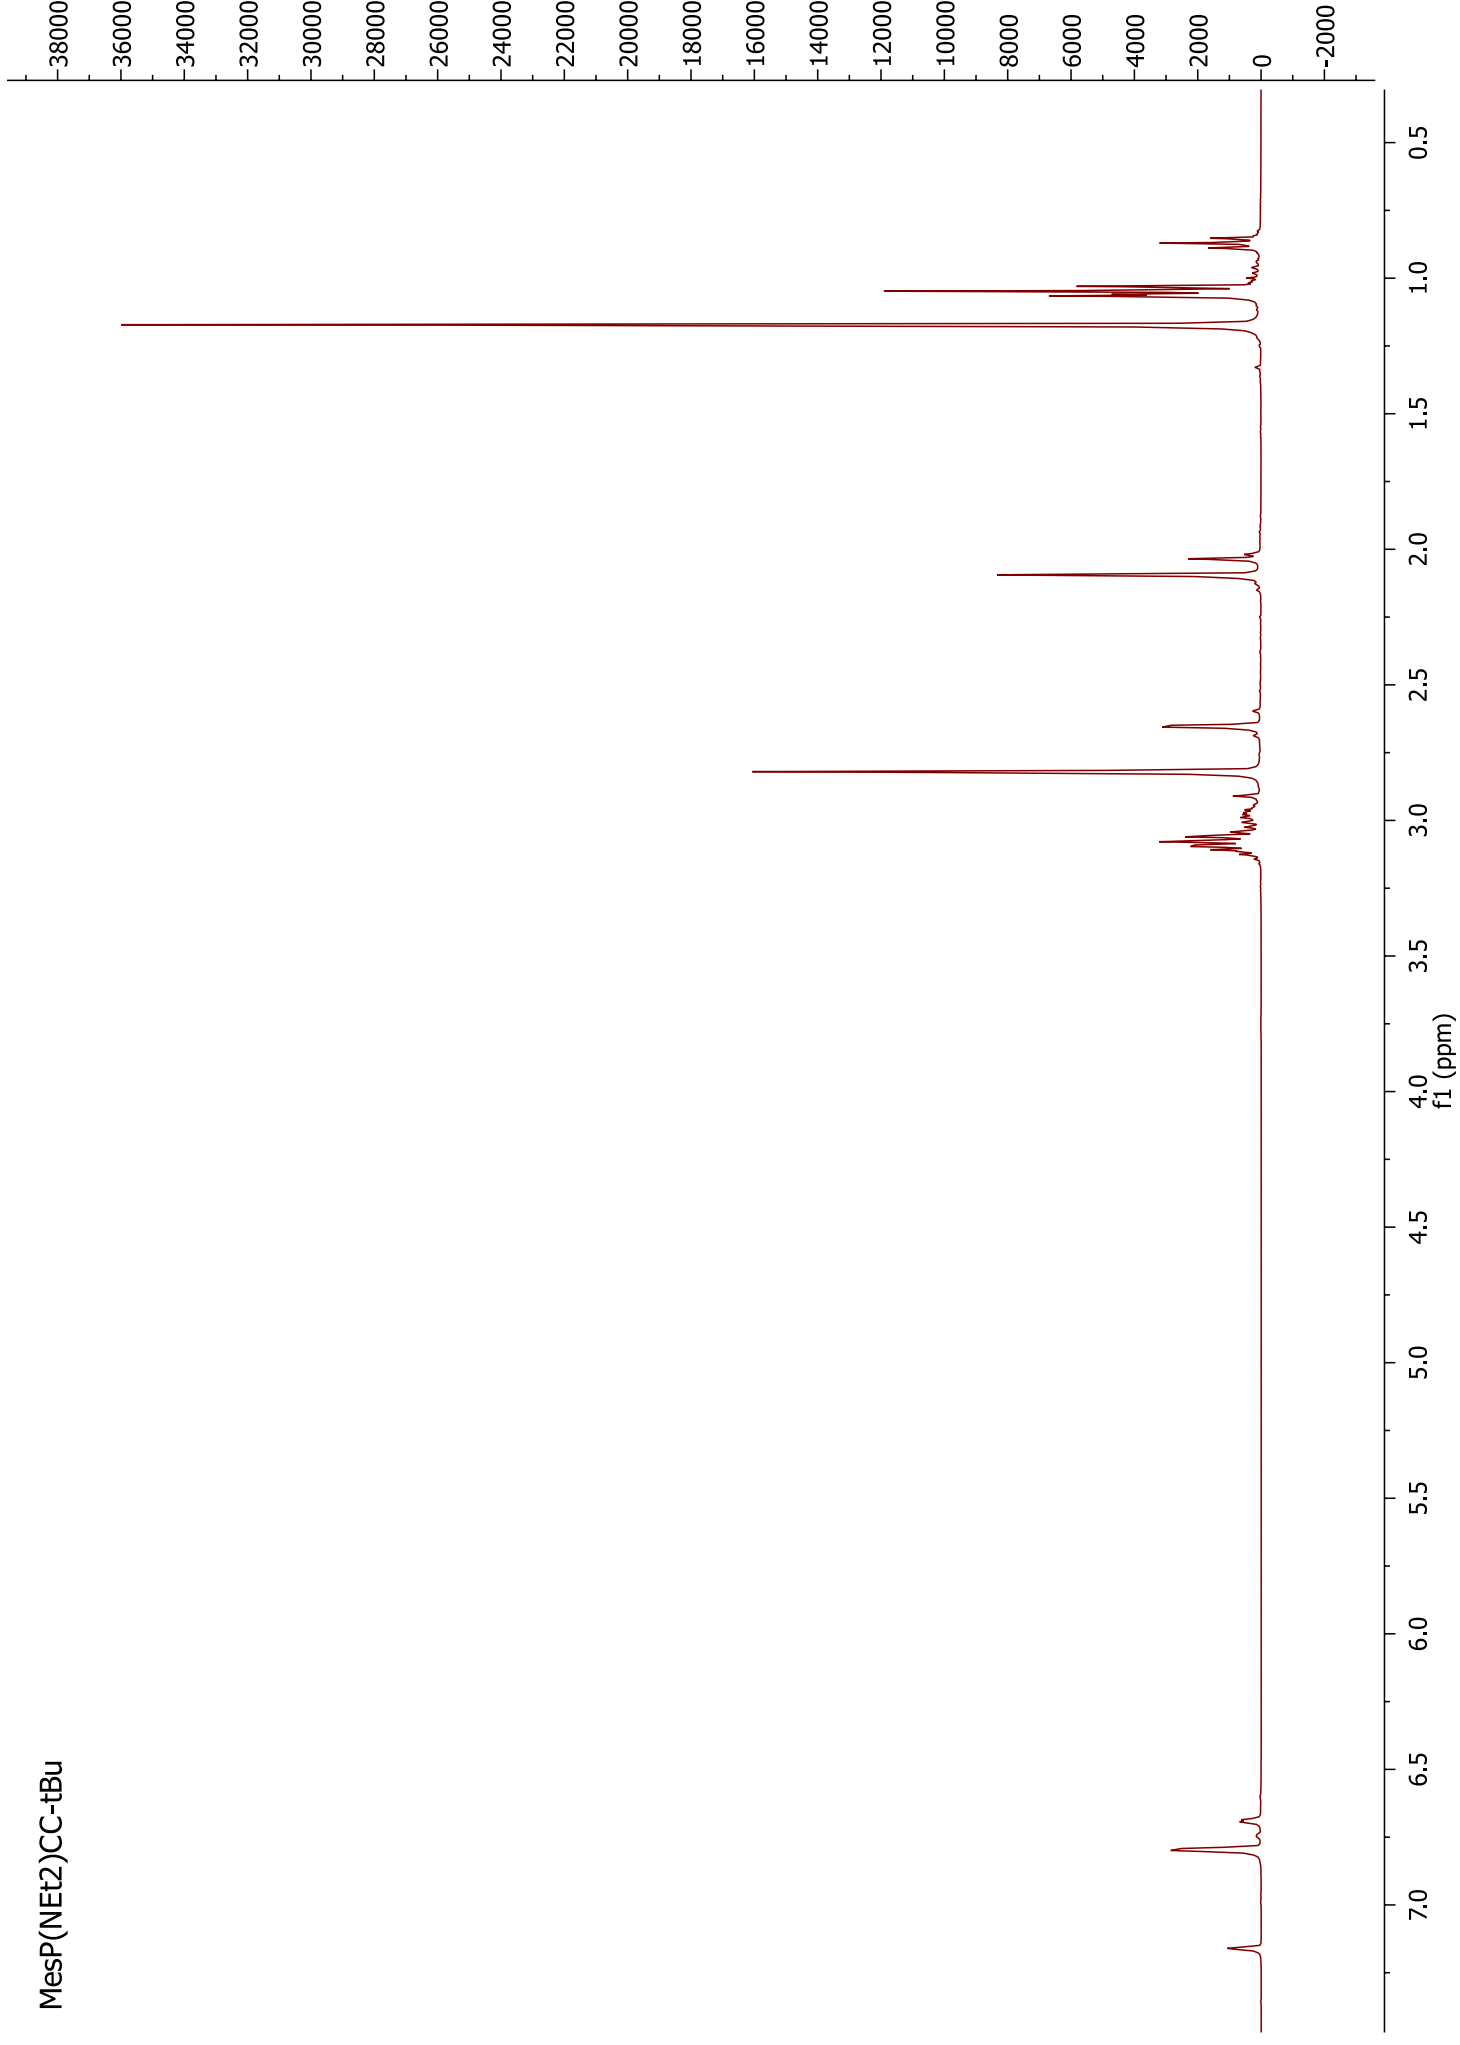

MesP(NiPr2)CC-tBu

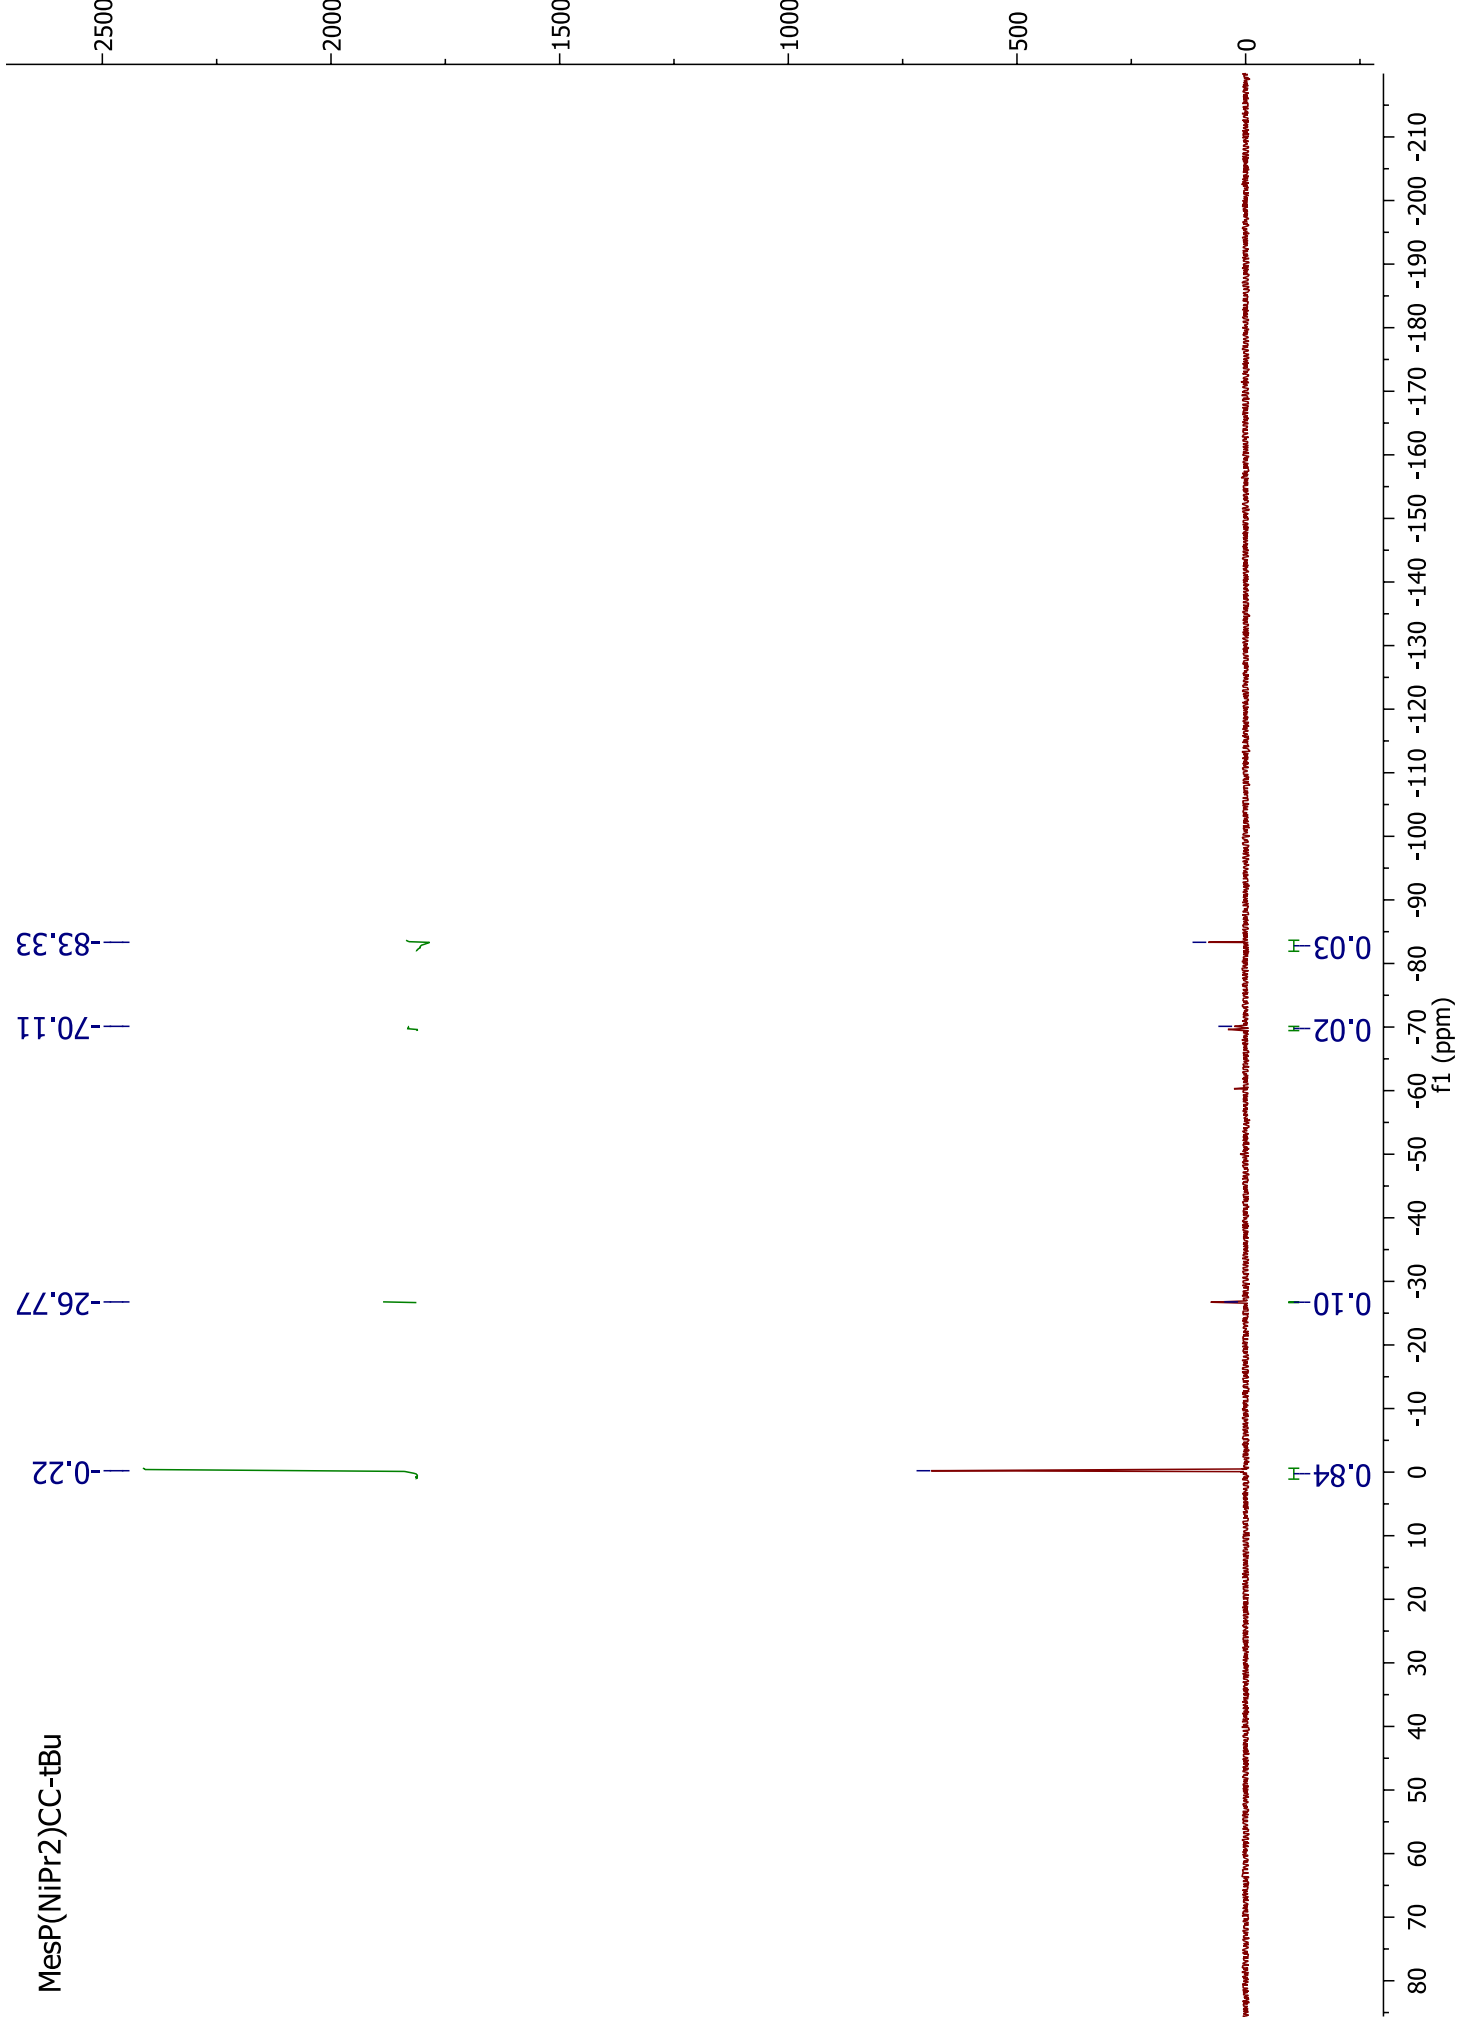

MesP(NiPr2)CC-tBu

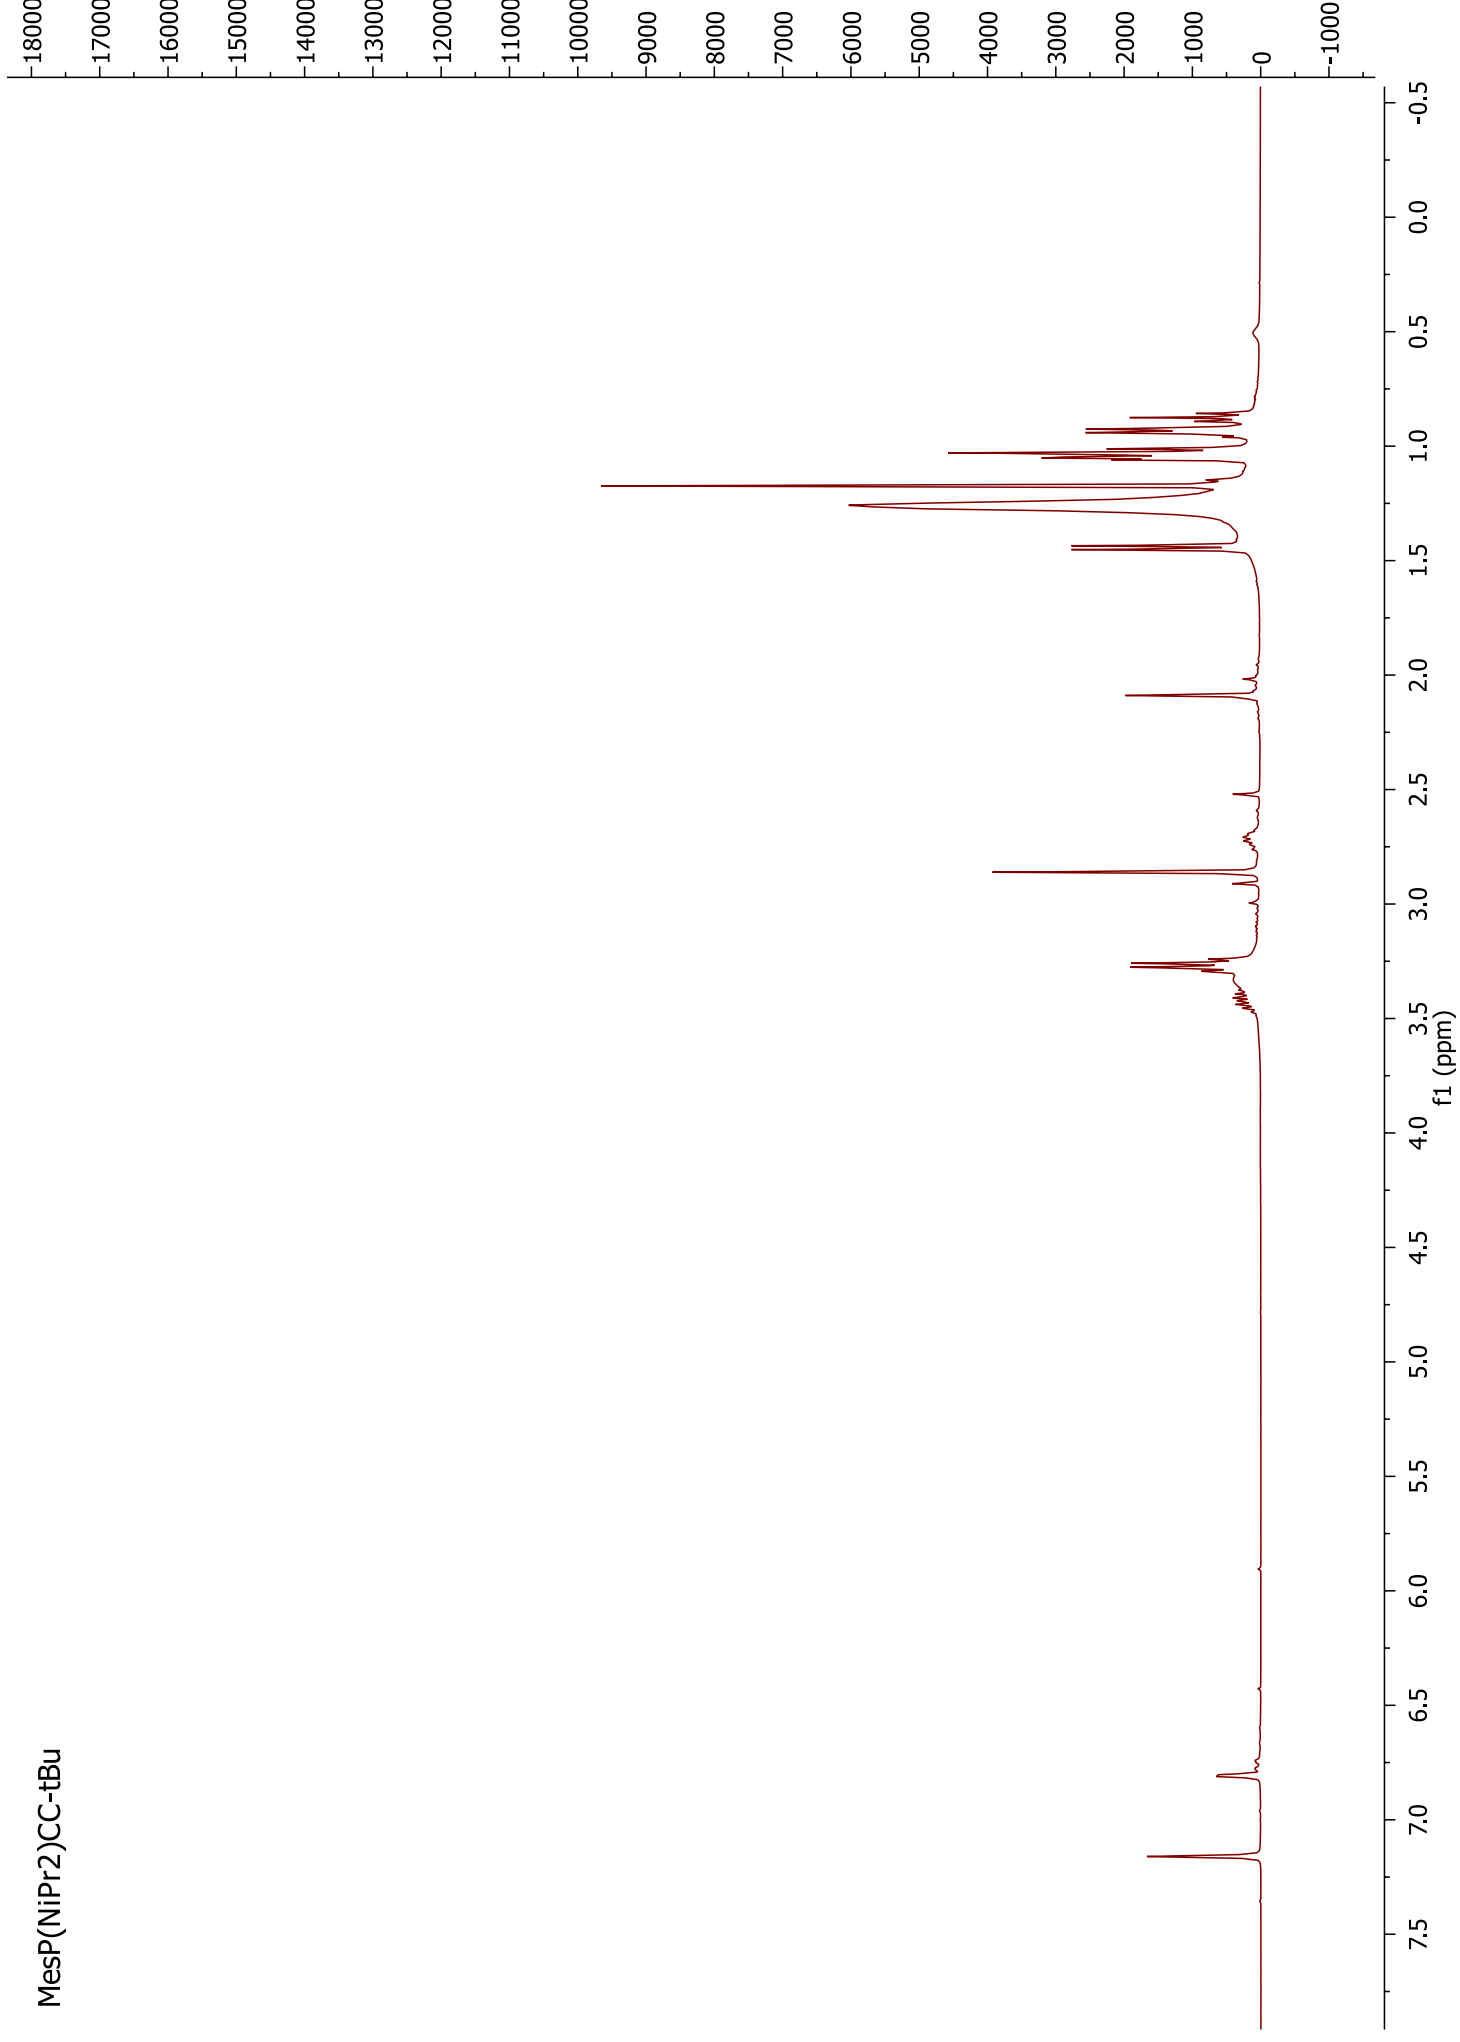

MesP(Me2Pip)CC-tBu

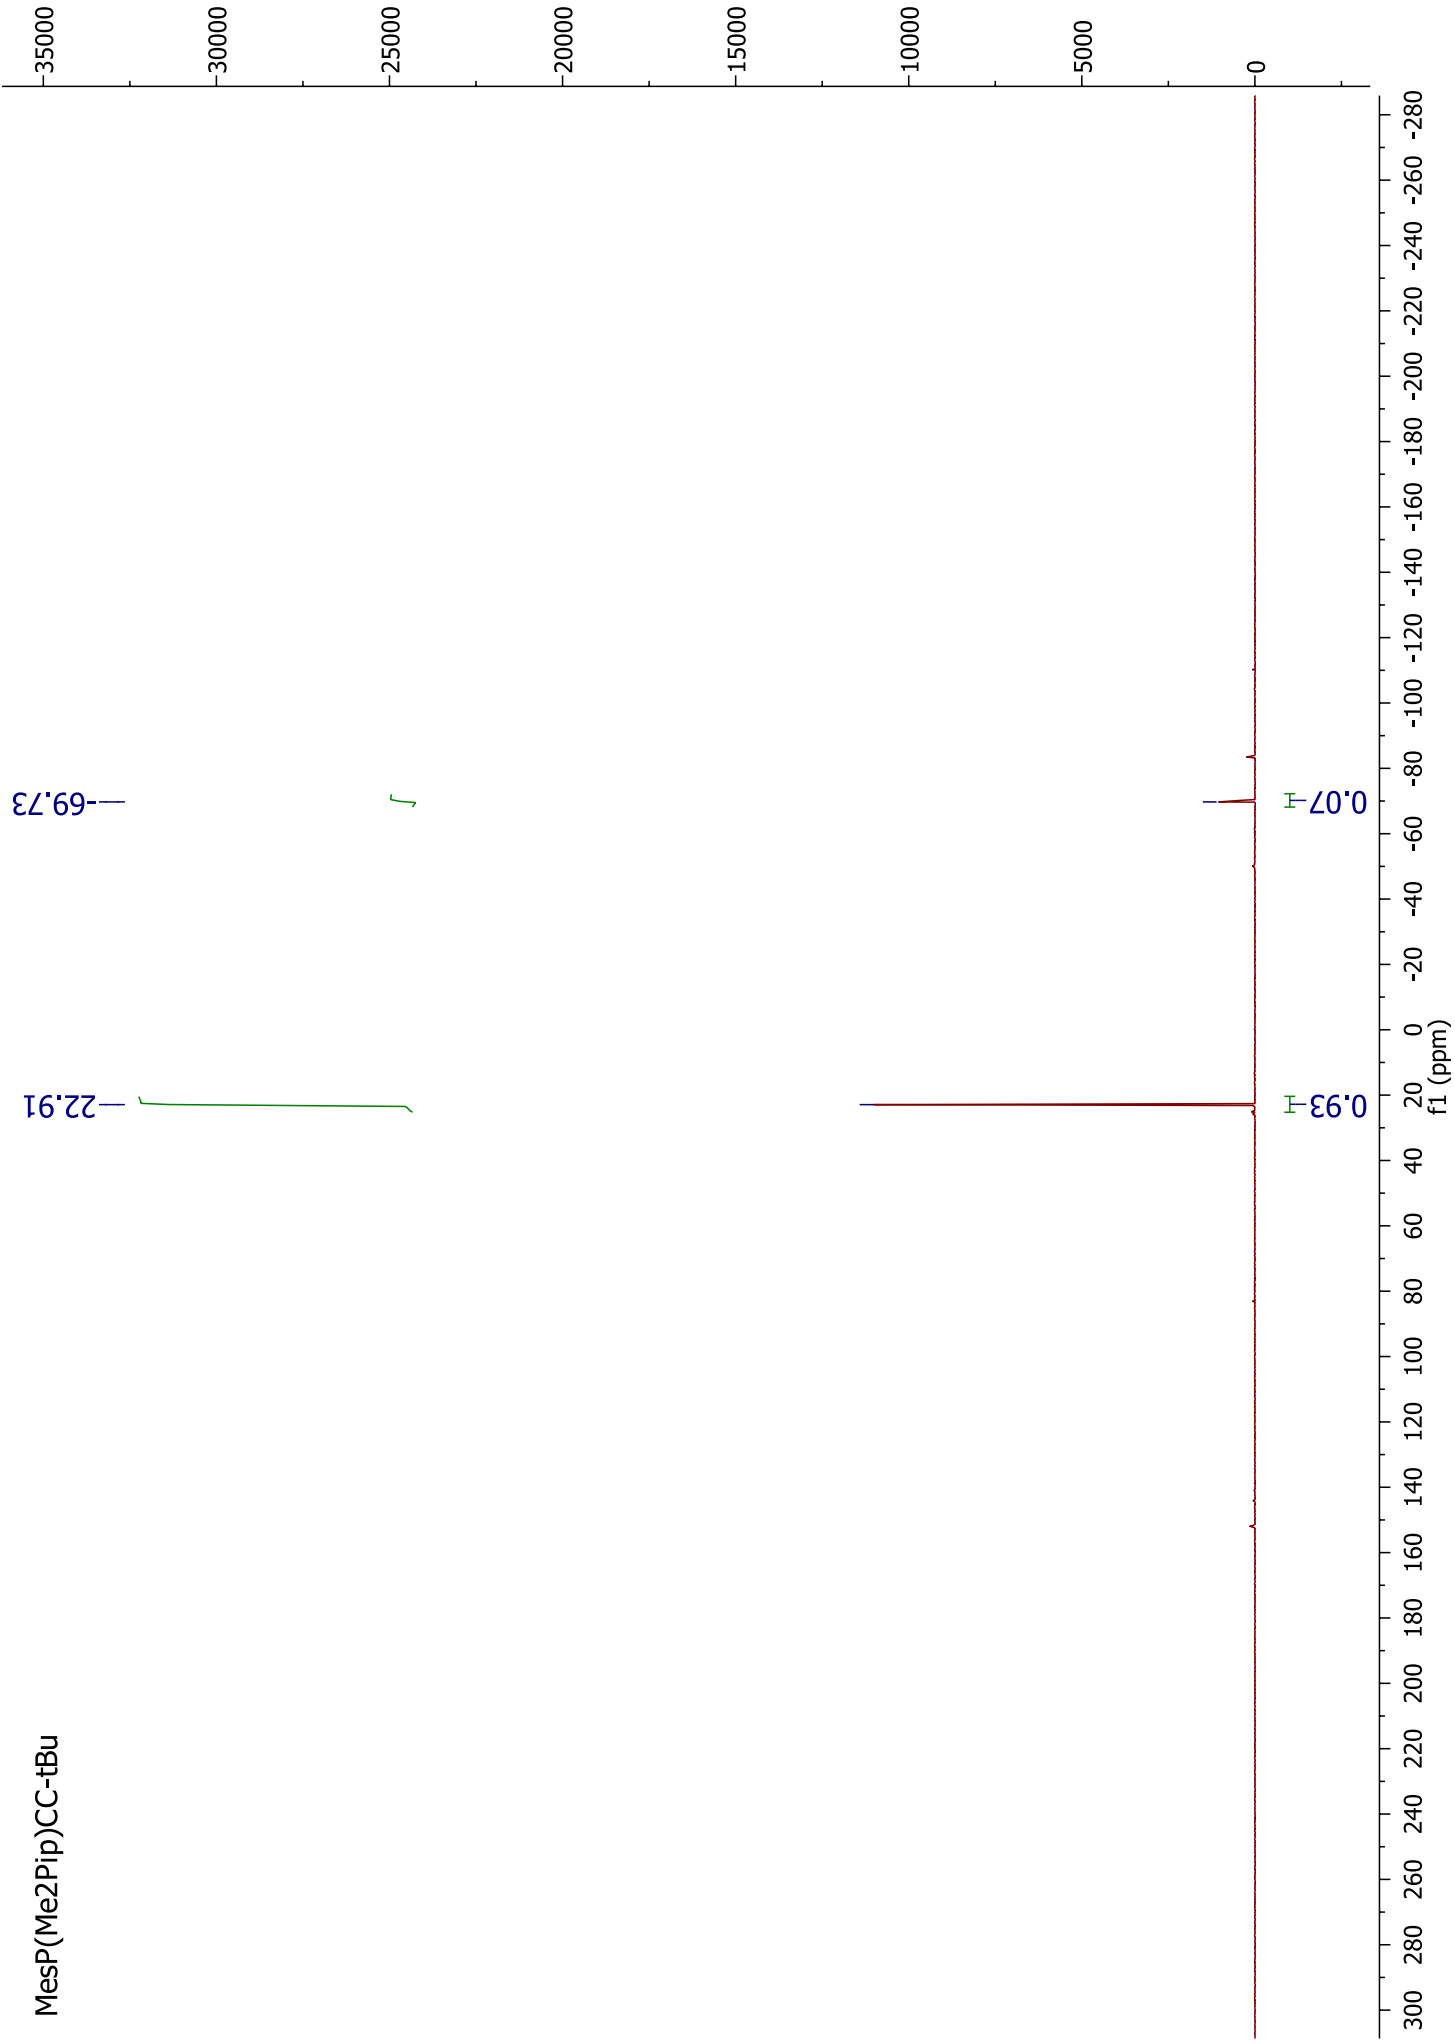

MesP(Me2Pip)CC-tBu

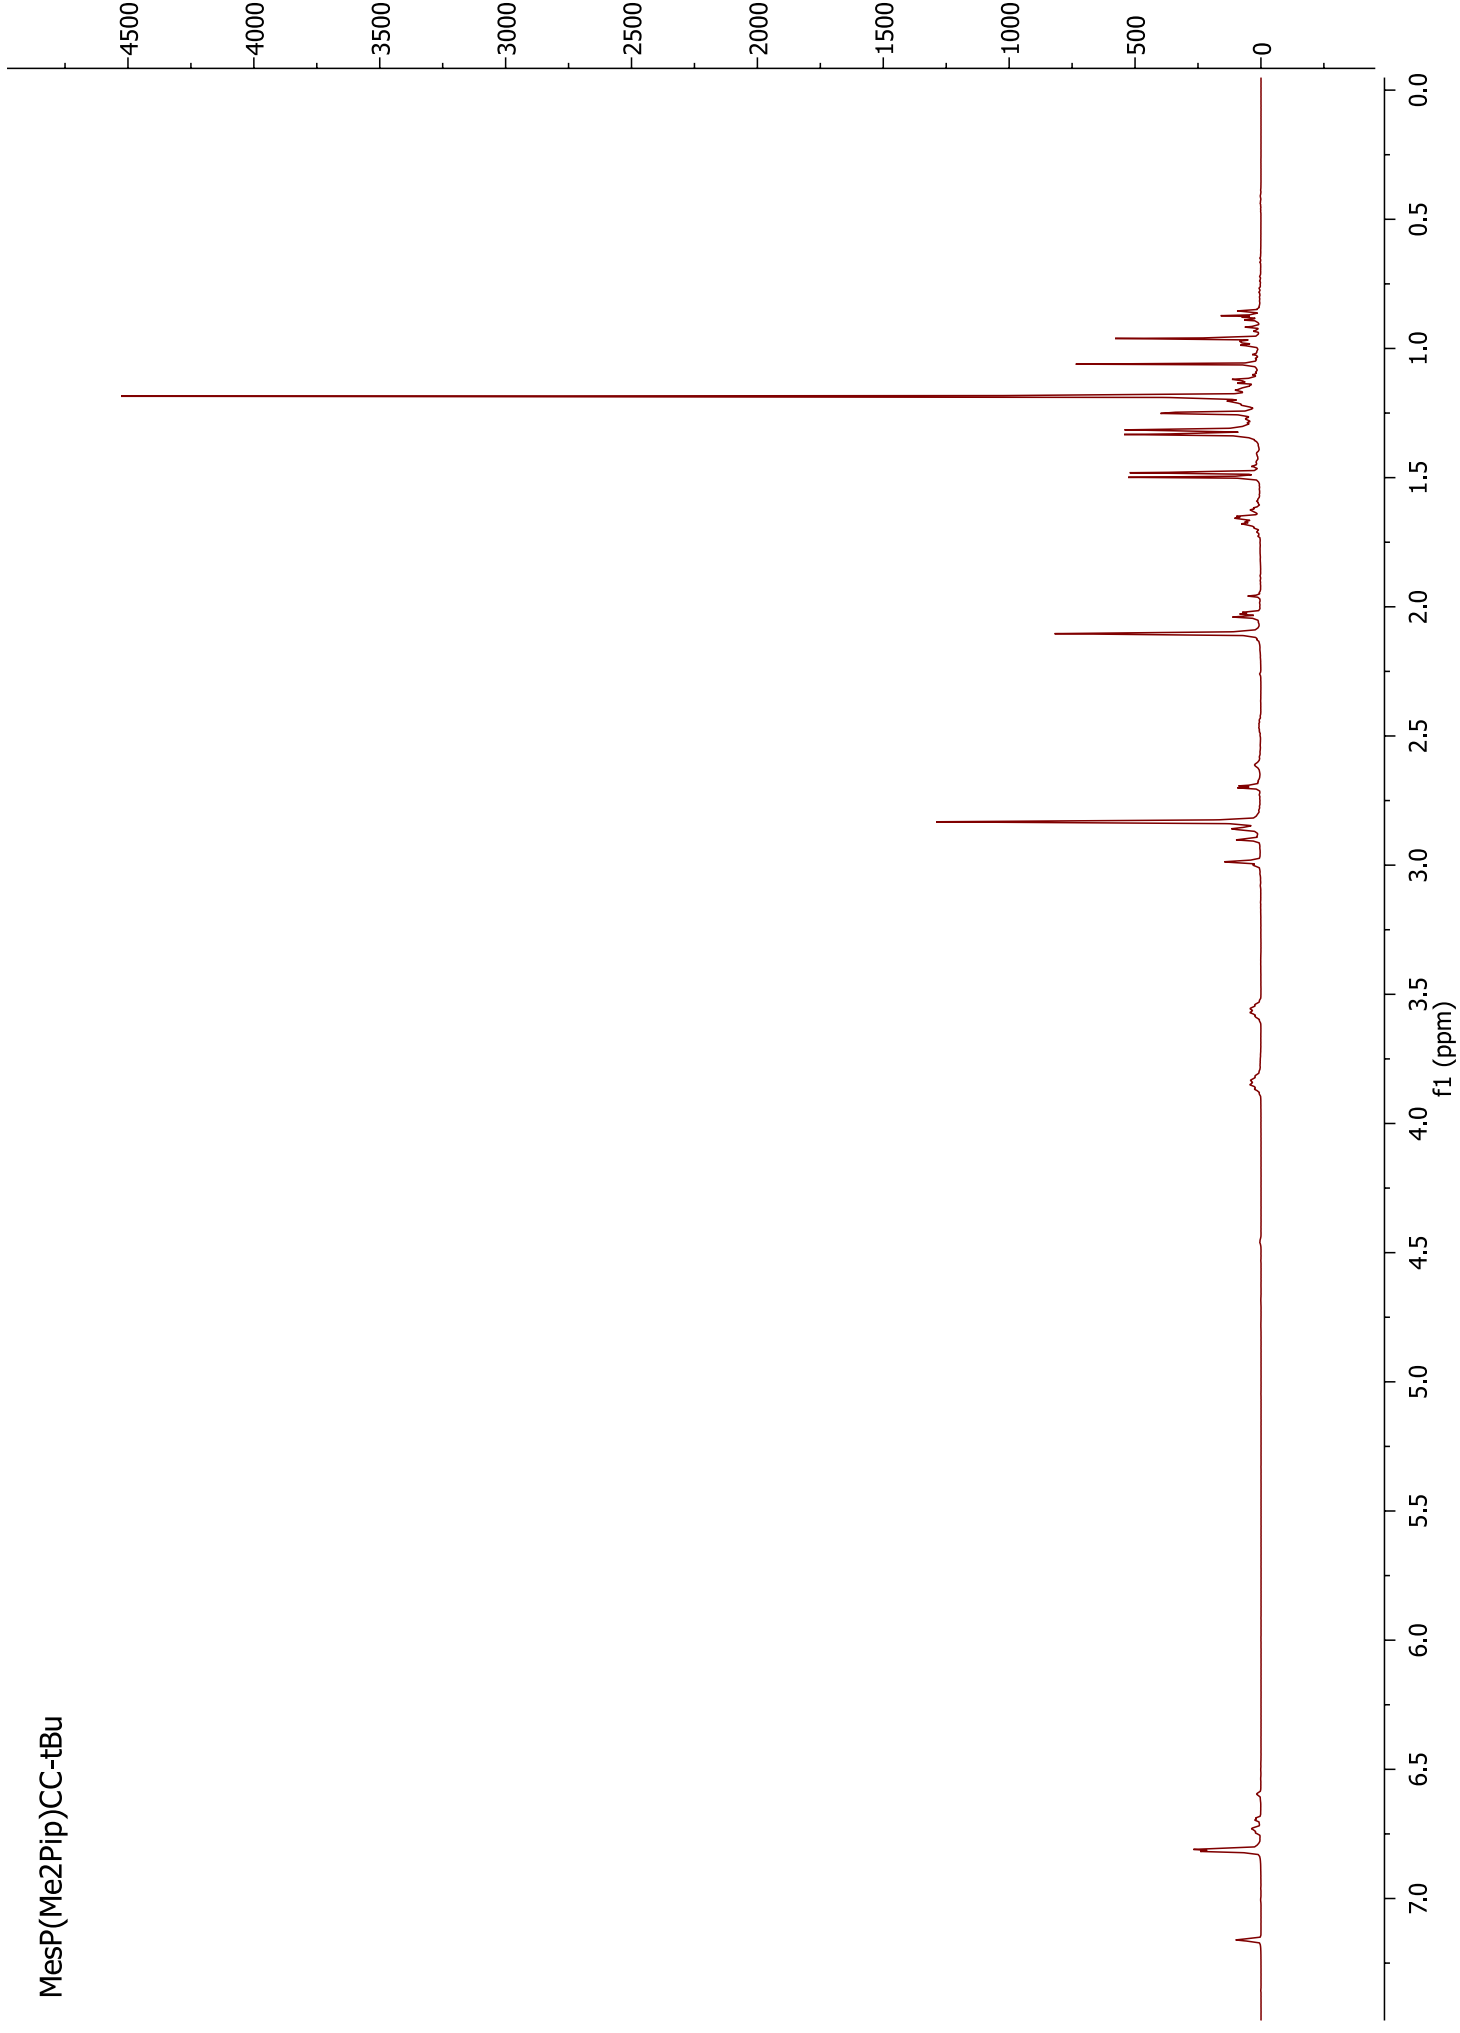



MesP(NTMS2)CC-tBu

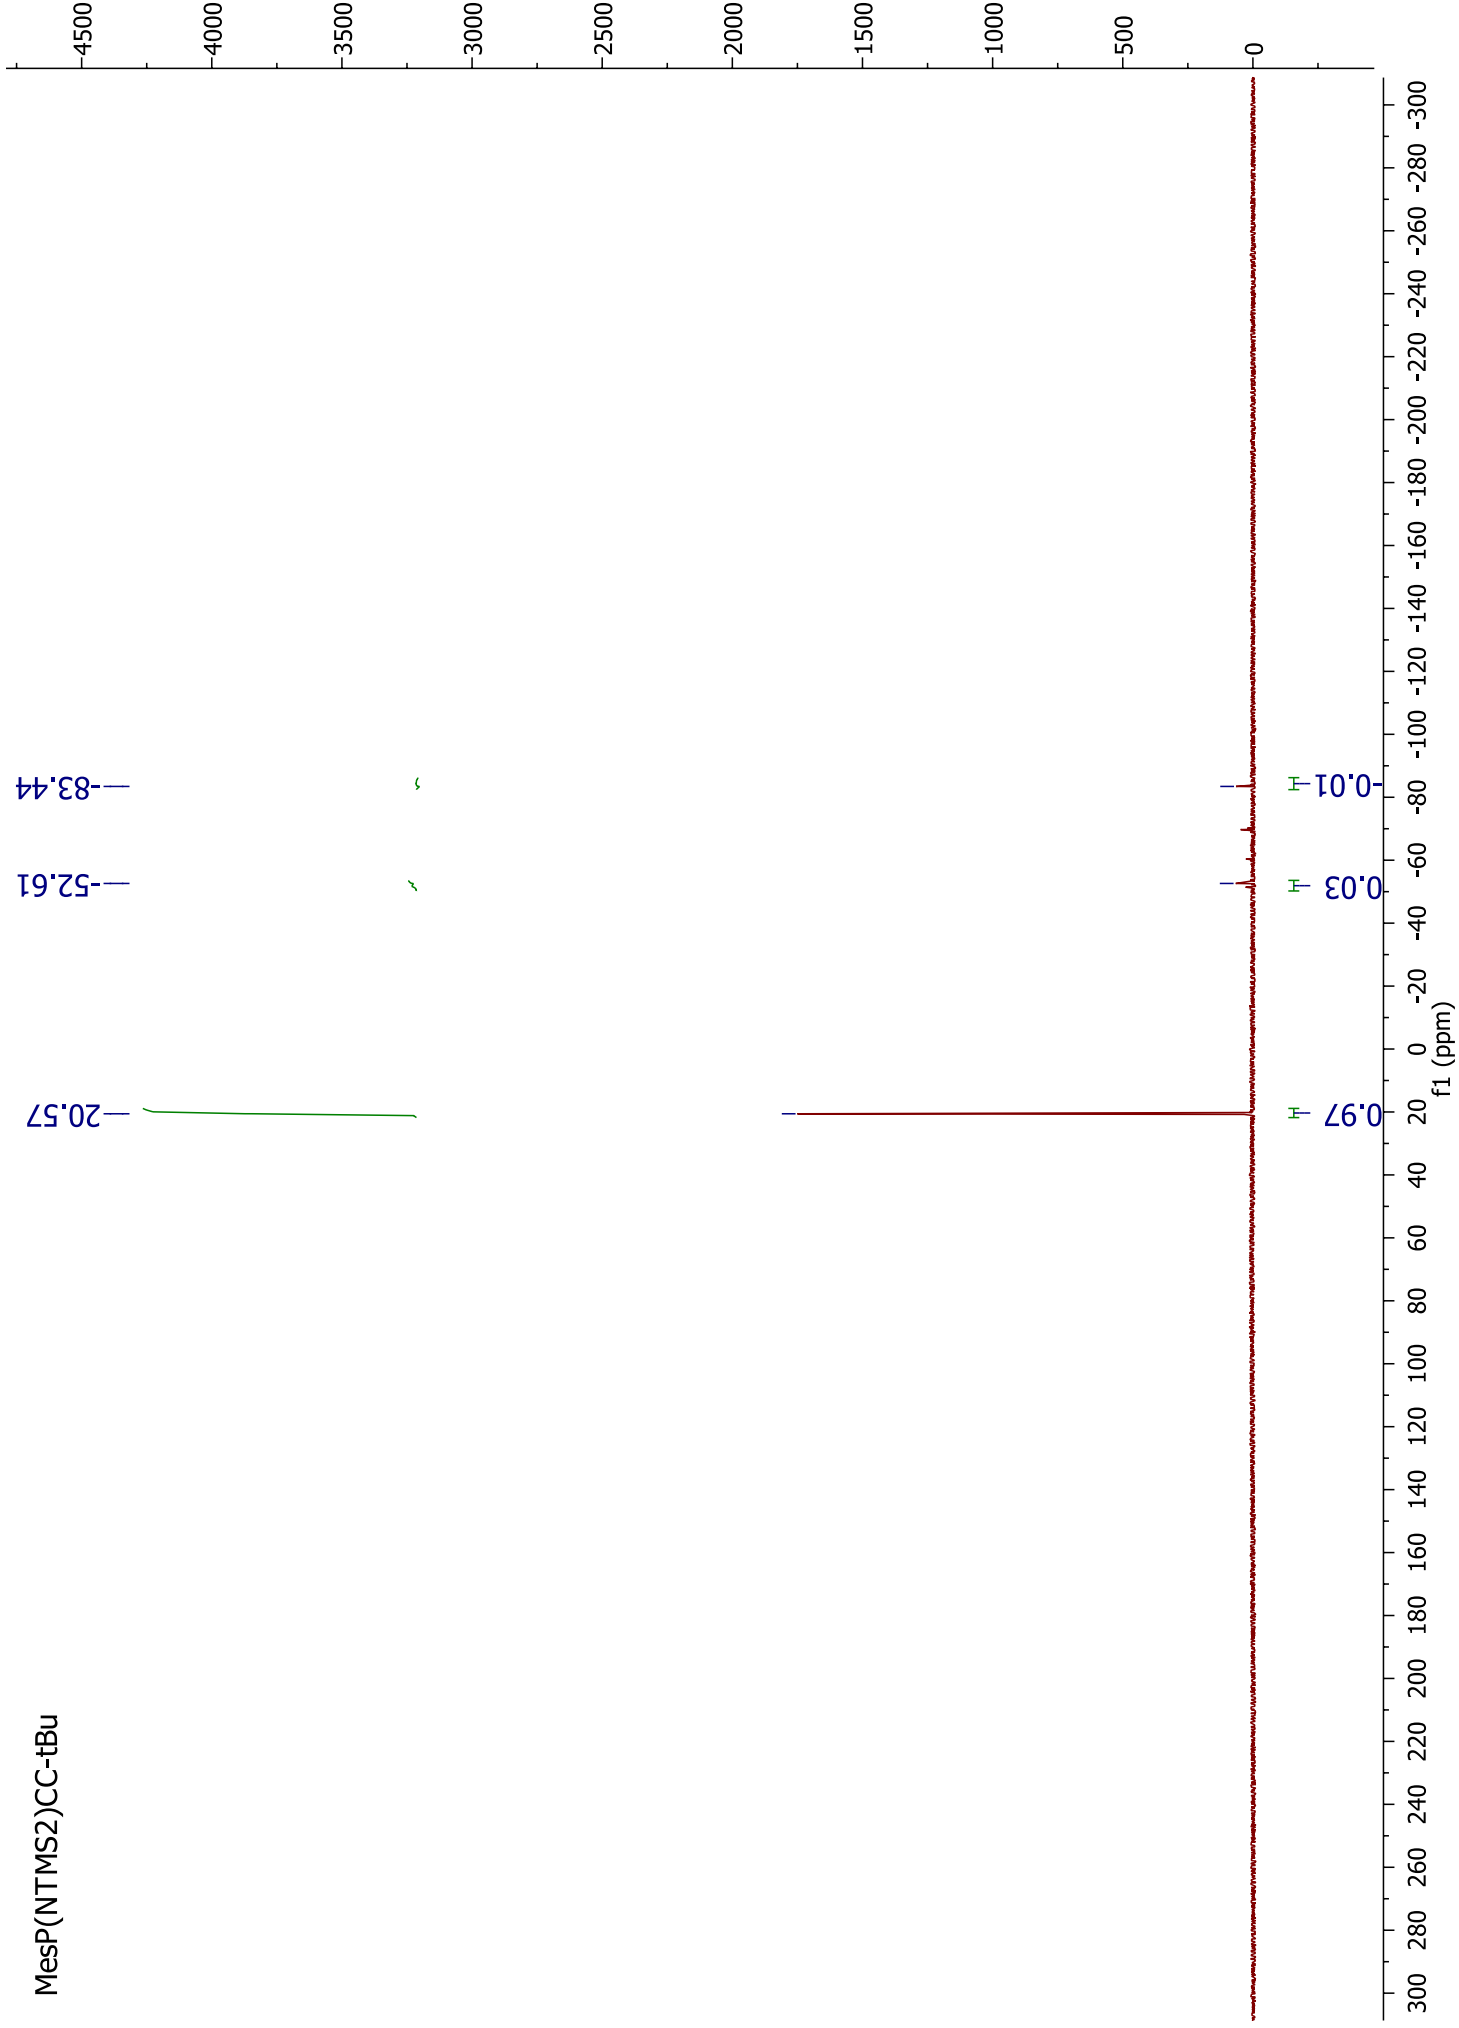

MesP(NTMS2)CC-tBu

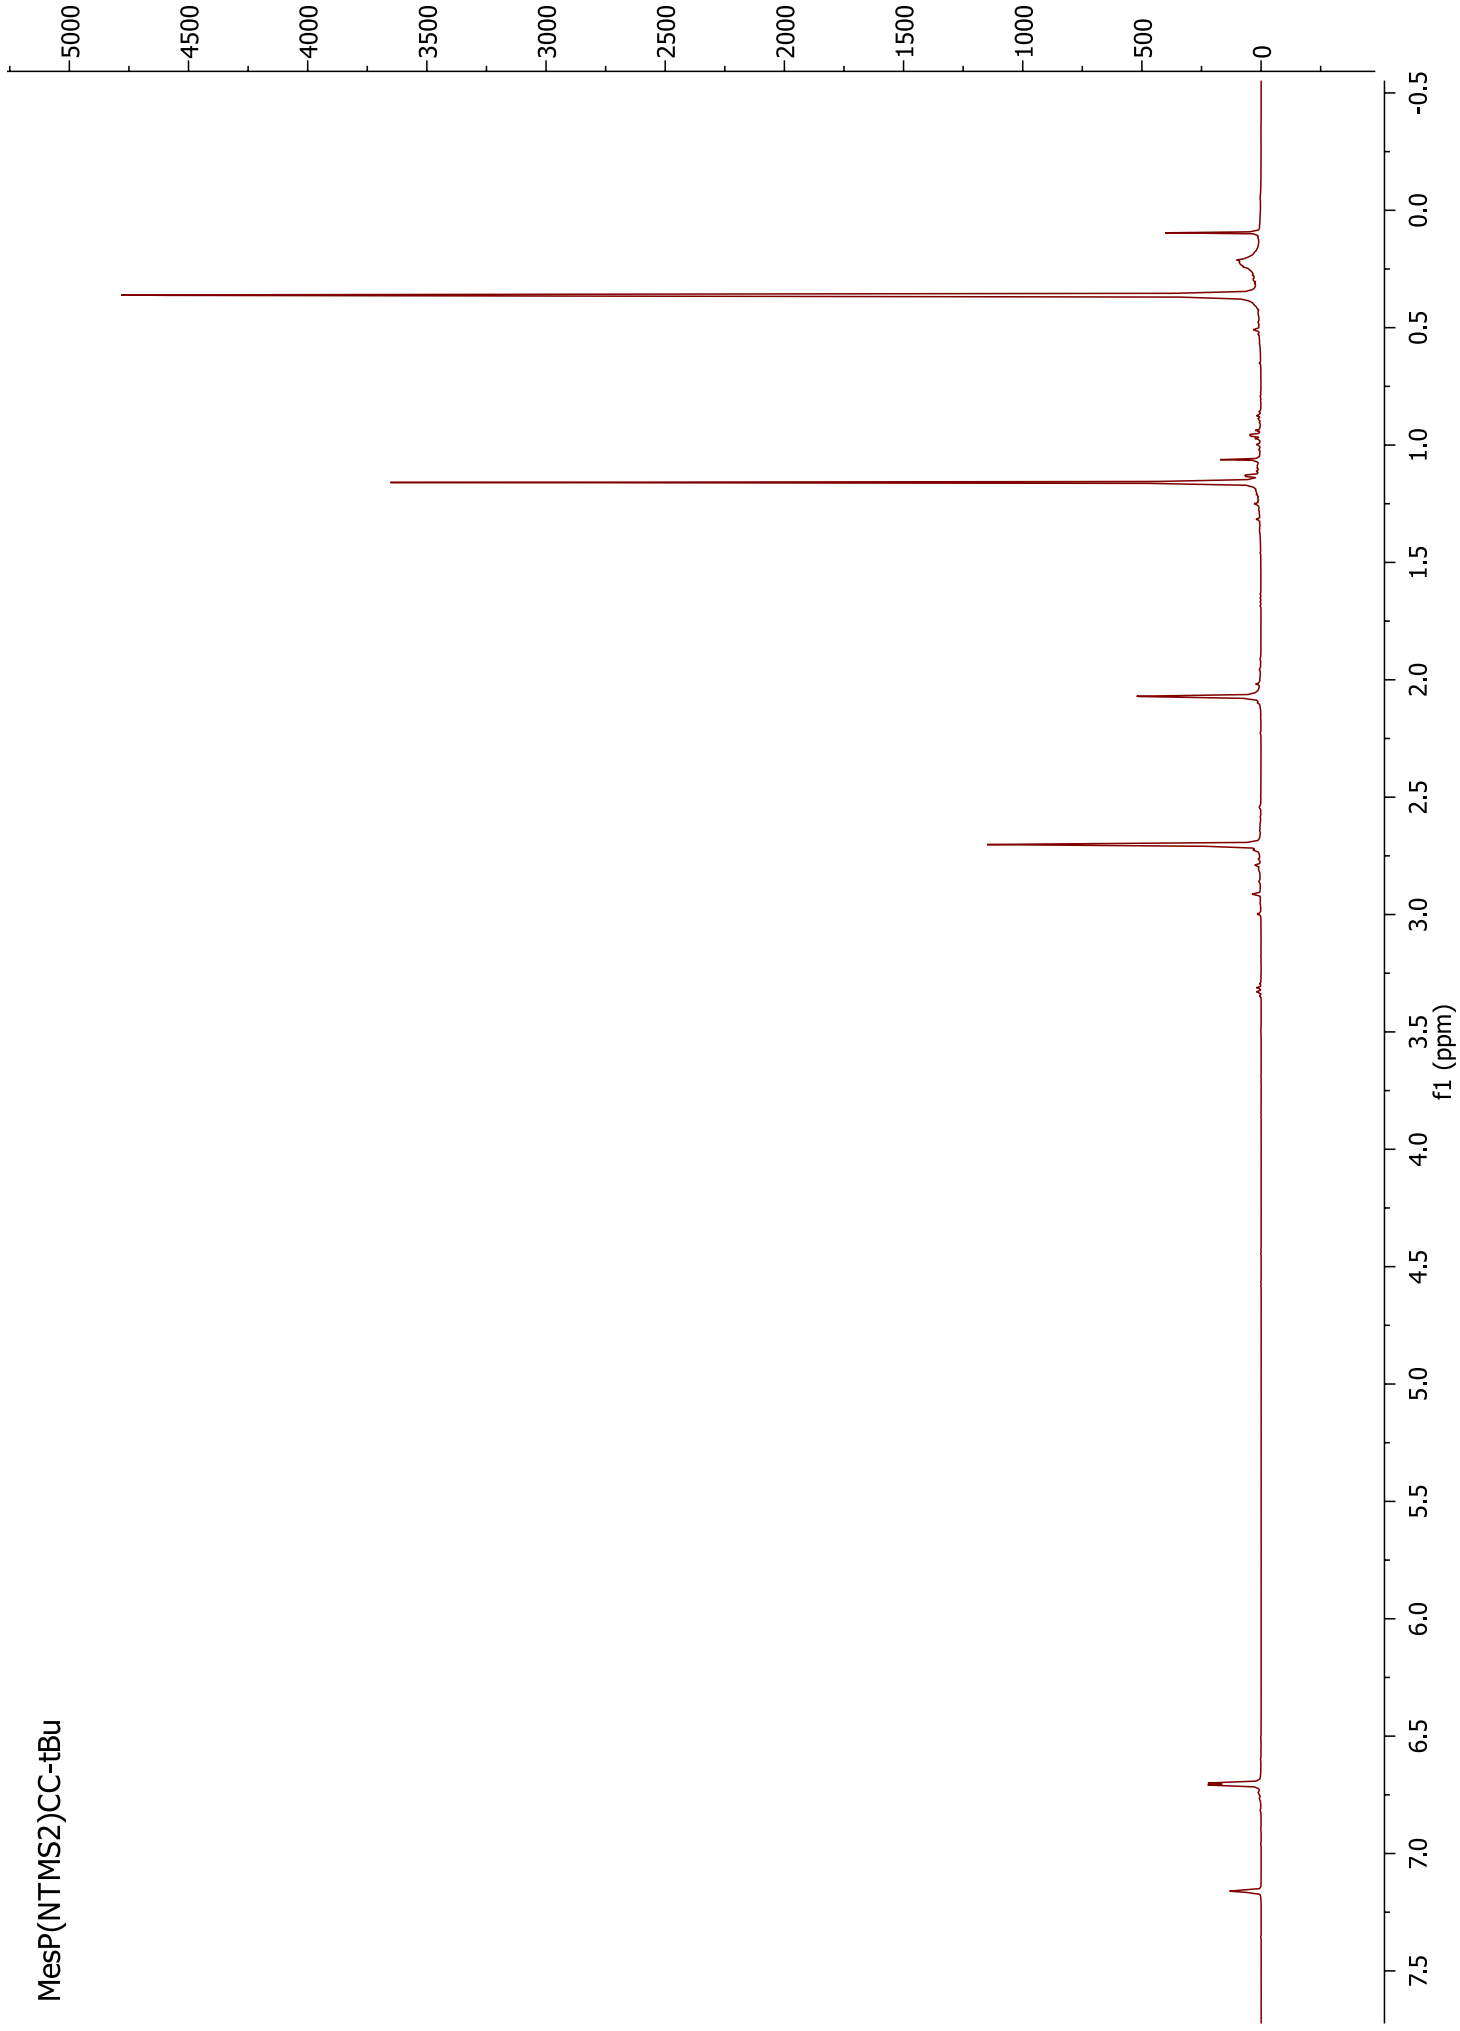

Supplement: c5dt02825f1.pdf [file c5dt02825f1.pdf]
